# Supplementary material
Source: PubMed Central journal article supplement (PMC6554551)
Supplement: mmc1.pdf [file mmc1.pdf]

YMTHE, Volume 27

## **Supplemental Information**

### **Improved CoChR Variants Restore Visual Acuity and Contrast Sensitivity in a Mouse Model of Blindness under Ambient Light Conditions**

**Tushar H. Ganjawala, Qi Lu, Mitchell D. Fenner, Gary W. Abrams, and Zhuo-Hua Pan**

|       |       |       |                                                    |                                        |                     |          |
|-------|-------|-------|----------------------------------------------------|----------------------------------------|---------------------|----------|
|       |       |       | 1                                                  | 10                                     | 20                  | 30       |
| CoChR | (1)   | ----- | MLGNGSAIVPIDQCFCLAWTDSLGS                          | DT                                     | EQ                  | L        |
| Chr2  | (1)   |       | MDYGGALSAVGRELLFVTNPVVVNGSVLVPEDQCYCAGWIESRGTNGAQT |                                        |                     |          |
|       |       |       | 31                                                 | 40                                     | 50                  | 60       |
| CoChR | (31)  |       | VANILQWF                                           | AFGFSILILMFYAYQTWRATCGWEEVYVCCVELTKVII | IEFFH               |          |
| Chr2  | (51)  |       | ASNVLQWLAAGFSILLLMFYAYQTKSTCGWEEIYVCAIEMVKVILEFFF  |                                        |                     |          |
|       |       |       | 81                                                 | 90                                     | 100                 | 110      |
| CoChR | (81)  |       | EFDDPSMLYLANGHRVQWLRYAEWLLT                        | CPVIL                                  | LIHLSNLTGLKDDYSKRTM |          |
| Chr2  | (101) |       | EFKNPSMLYLATGHRVQWLRYAEWLLT                        | CPVIL                                  | LIHLSNLTGLSNDYSRRTM |          |
|       |       |       | 131                                                | 140                                    | 150                 | 160      |
| CoChR | (131) |       | RLLVSDVGTIVWGATSAMSTGYVKVIFVVLGCIYGANTFFHAAKVYIESY |                                        |                     |          |
| Chr2  | (151) |       | GLLVSDIGTIVWGATSAMATGYVKVIFVFLGLCYGANTFFHAAKAYIEGY |                                        |                     |          |
|       |       |       | 181                                                | 190                                    | 200                 | 210      |
| CoChR | (181) |       | HVVPKGRPRTVVRIMAWLFFLSWGMFPVLFVVGPEGFDAISVYGSTIGHT |                                        |                     |          |
| Chr2  | (201) |       | HTVPKGRCRQVVTGMAWLFFVSWGMFPILFILGPEGFGVLSVYGSTVGH  |                                        |                     |          |
|       |       |       | 231                                                | 240                                    | 250                 | 260      |
| CoChR | (231) |       | IIDLMSKNCWGLLGHYLRVLIHQHIIIIYGD                    | IRK                                    | TKINVAGE            | EMEVETMV |
| Chr2  | (251) |       | IIDLMSKNCWGLLGHYLRVLIHEHILIHGDIRKTTKLNIGGTEIEVETLV |                                        |                     |          |
|       |       |       | 281                                                |                                        |                     |          |
| CoChR | (281) |       | DQ                                                 | EE                                     | ETV                 | -----    |
| Chr2  | (301) |       | EE                                                 | EA                                     | EAGAVNKGTGK         |          |

**Figure S1. Alignment of the amino acid sequences of Chr2 and CoChR**  
The labeled amino acids are for CoChR. The conserved amino acids are highlighted in yellow. The mutated amino acids in CoChR reported in this study are highlighted in red.

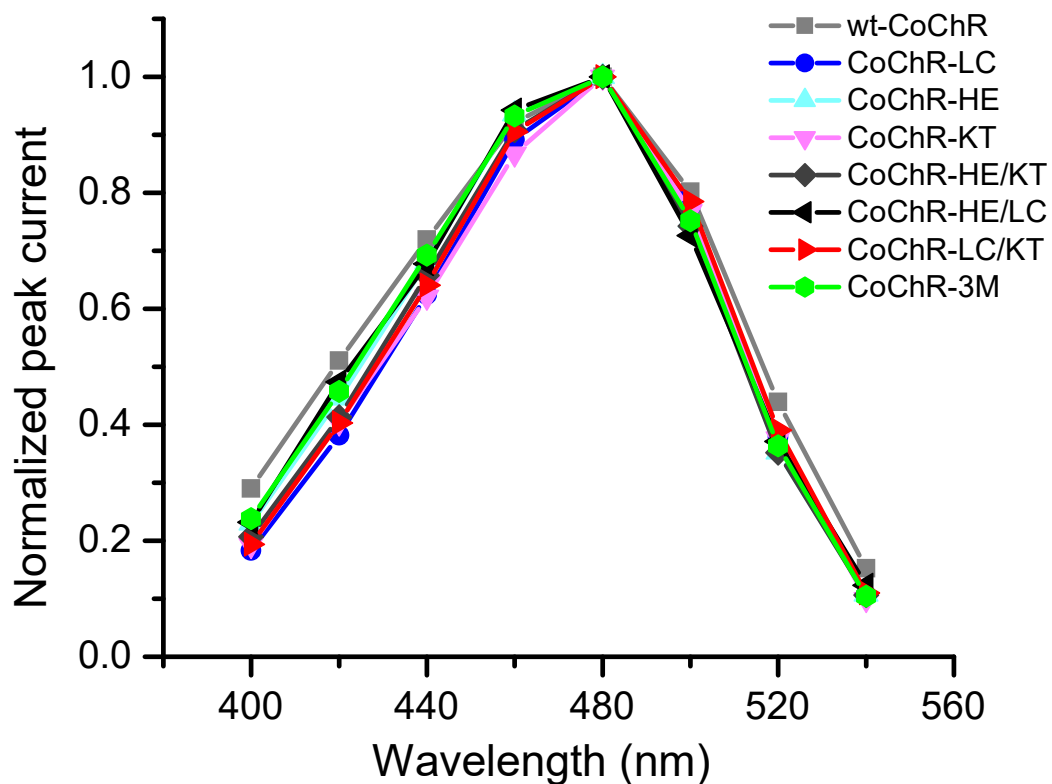

**Figure S2. Comparison of the spectral properties of wt-CoChR and CoChR mutants in HEK cells**

Photocurrents were elicited by 1-s light pulses of different wavelengths with a ND filter of 2.5. The spectral curves are normalized to the peak photocurrents. The data for each mutant are the average of 3 cells.

**Table S1. Off-rates and peak current amplitudes for wt-CoChR and CoChR mutants examined in HEK cells**

| <b>CoChR mutants</b> | <b>Off rate (ms)<br/>mean <math>\pm</math> SEM</b> | <b>Current (pA)<br/>mean <math>\pm</math> SEM</b> | <b><i>n</i></b> |
|----------------------|----------------------------------------------------|---------------------------------------------------|-----------------|
| Wild type            | 112 $\pm$ 11                                       | 368 $\pm$ 44                                      | 10              |
| L112C                | 372 $\pm$ 56                                       | 593 $\pm$ 91                                      | 10              |
| L112A                | 1429 $\pm$ 170                                     | 707 $\pm$ 183                                     | 6               |
| L112D*               | nd                                                 | 33 $\pm$ 7                                        | 5               |
| L112S                | 1433 $\pm$ 96                                      | 474 $\pm$ 71                                      | 3               |
| T139C                | 292 $\pm$ 33                                       | 393 $\pm$ 77                                      | 7               |
| T139A                | 2109 $\pm$ 449                                     | 452 $\pm$ 131                                     | 7               |
| T139S                | 671 $\pm$ 59                                       | 354 $\pm$ 118                                     | 6               |
| L112C-T139C          | 751 $\pm$ 102                                      | 577 $\pm$ 123                                     | 6               |
| C108A*               | No deactivation                                    | 152 $\pm$ 4                                       | 3               |
| C108T*               | 903 $\pm$ 180                                      | 52 $\pm$ 13                                       | 3               |
| D136A*               | nd                                                 | nd                                                | 3               |
| D136C*               | nd                                                 | 39 $\pm$ 25                                       | 3               |
| D136T*               | nd                                                 | nd                                                | 2               |
| K264T                | 186 $\pm$ 18                                       | 640 $\pm$ 90                                      | 10              |
| H94E                 | 174 $\pm$ 12                                       | 388 $\pm$ 42                                      | 10              |
| H95E-K264T           | 133 $\pm$ 12                                       | 212 $\pm$ 35                                      | 11              |
| H94E-L112C           | 614 $\pm$ 46                                       | 618 $\pm$ 80                                      | 10              |
| L112C-K264T          | 376 $\pm$ 36                                       | 516 $\pm$ 65                                      | 13              |
| H94E-L112C-K264T     | 723 $\pm$ 71                                       | 955 $\pm$ 87                                      | 10              |

Mutants noted with an asterisk exhibited notable aggregation. nd: not determined.

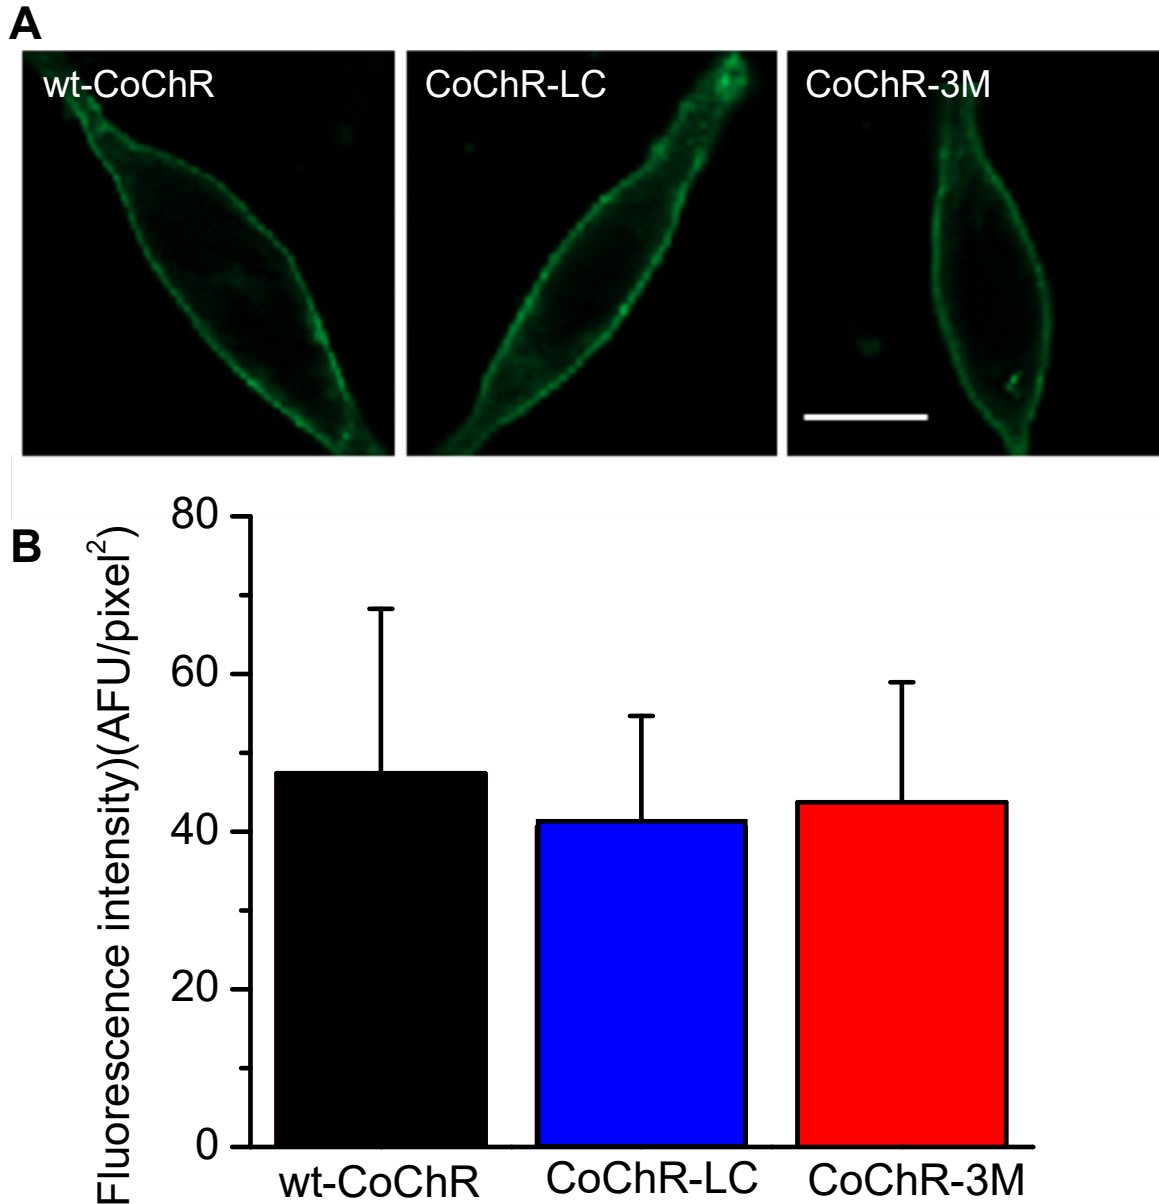

**Figure S3. Comparison of the membrane expression efficiencies of CoChRs in HEK cells**

(A) Representative images showing the expression of ChR-GFP for wt-CoChR, CoChR-LC, and CoChR-3M. Scale bar, 10  $\mu\text{m}$ . (B) Fluorescence intensities measured in the plasma membrane region. The data are shown in arbitrary fluorescence units (AFU/pixel<sup>2</sup>) (means  $\pm$  SD; n = 29 – 38 cells).

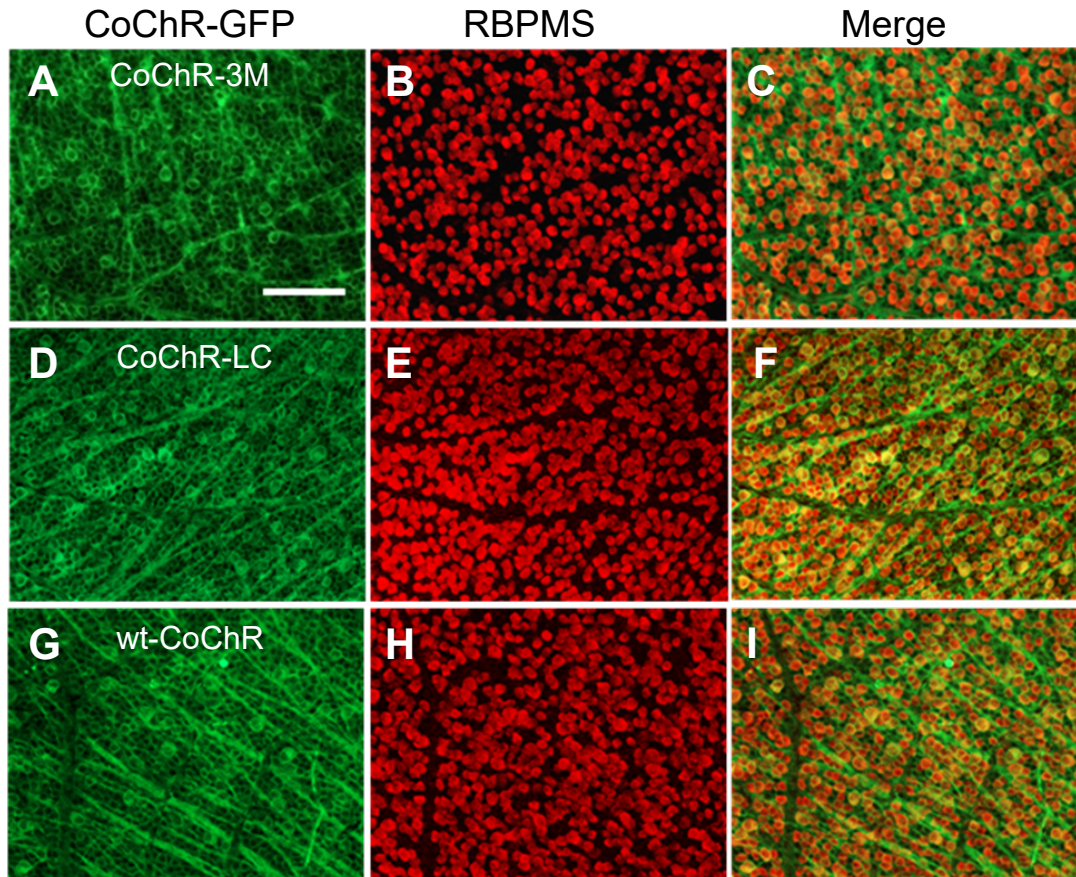

**Figure S4. Expression of CoChR-GFP in TKO mouse retinas *in vivo***  
 Representative immunofluorescence images showing co-labeling of GFP with RBPMS in retinal whole mounts for CoChR-3M (A–C), CoChR-L112C (D–F), wt-CoChR (G–I). Scale bar, 100  $\mu$ m.
